# Supplementary material for: The Endoplasmic Reticulum Chaperone GRP78/BiP Modulates Prion Propagation in vitro and in vivo
Source: PubMed Central journal article supplement (PMC5363067; doi:10.1038/srep44723), 2017-03-23

## **SUPPLEMENTARY INFORMATION**

### **The Endoplasmic Reticulum Chaperone GRP78/BiP Modulates Prion Propagation *in vitro* and *in vivo***

**Kyung-Won Park, Gyoung Eun Kim, Rodrigo Morales, Fabio Moda, Ines Moreno-Gonzalez, Luis  
Concha-Marambio, Amy S. Lee, Claudio Hetz and Claudio Soto**

**SUPPLEMENTARY FIGURE 1: Expression levels of PrP<sup>C</sup> in cells treated with GRP78 siRNA.**

CAD5 cells transfected with *GRP78* siRNA or control siRNA were harvested and lysed. The level of PrP<sup>C</sup> before proteinase K treatment was analyzed by Western blotting. The graph depicts the densitometric analysis of 3 replicated blots as the one shown in the left. Values correspond to the average  $\pm$  standard error. Statistical differences were analyzed by using student's t-test.

**SUPPLEMENTARY FIGURE 2: GRP78 reduces the amount of protease-resistant PrP<sup>Sc</sup> *in vitro***

**from various murine prion strains.** Brain homogenates from terminally ill animals infected with the 301C or 79A prion strains were incubated with different concentrations of recombinant GRP78 for 20hr (1200 minutes). The amount of PrP<sup>Sc</sup> remaining resistant to PK digestion was assessed by Western blotting. Numbers in the top represent GRP78 concentrations, expressed as  $\mu$ M.

**SUPPLEMENTARY FIGURE 3: Purification of recombinant GRP78. A:**

The degree of GRP78 purity after different steps during the purification procedure was analyzed by electrophoresis on a 4–12% SDS-polyacrylamide gels (SDS-PAGE) stained with Coomassie Blue. Lane 1, total lysate; lane 2, supernatant after centrifugation; lane 3, pellet after centrifugation; lanes 4-10, Elution fractions 1-6 of Ni-nitrilotriacetic acid (NTA) Superflow column. **B:** Western blotting with different amount of purified recombinant GRP78. MWM: molecular weight markers.

# Supplementary figure 1

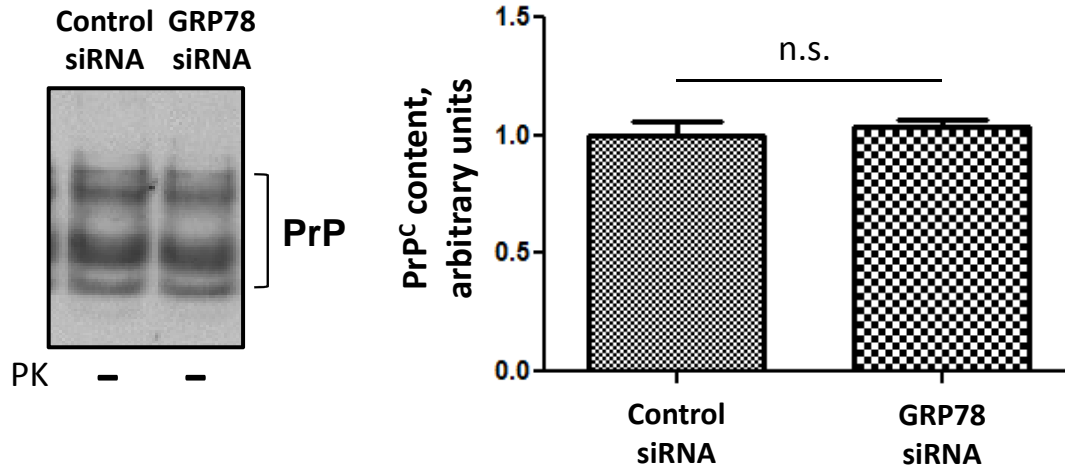

## Supplementary figure 2

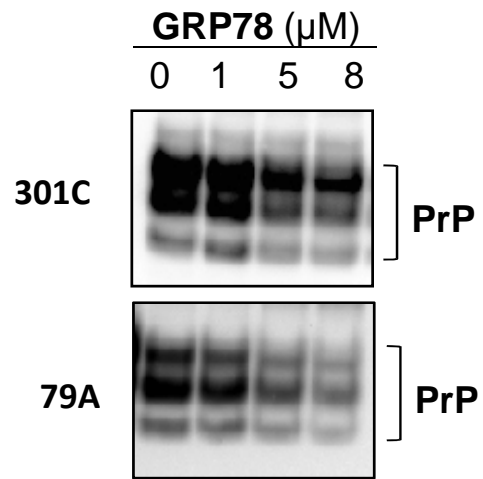

# Supplementary figure 3

**A**

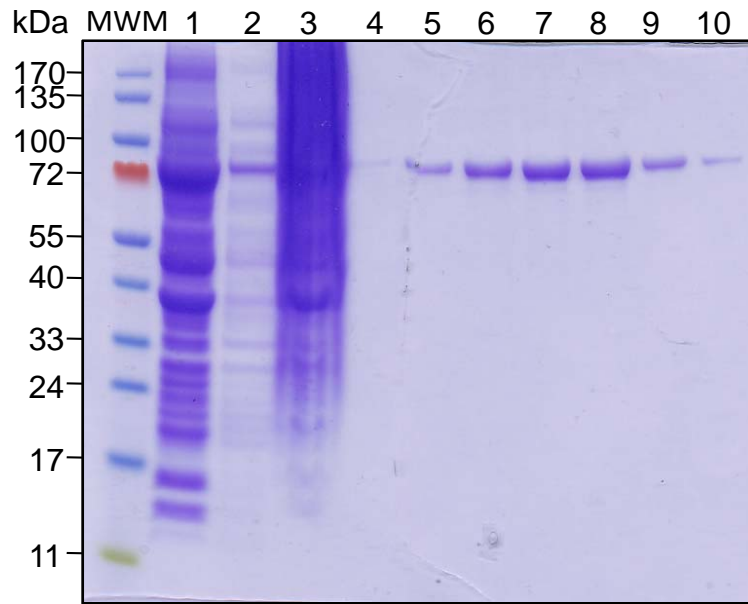

**B**

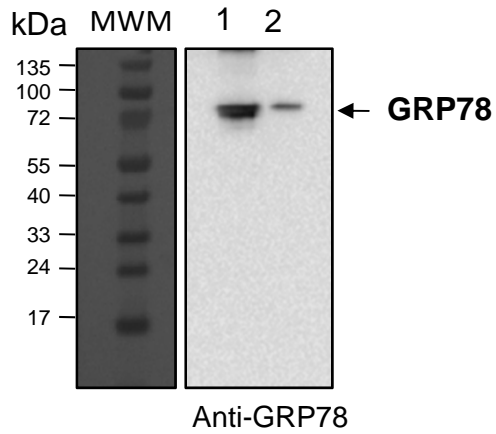

Supplement: srep44723-s1.pdf [file srep44723-s1.pdf]
